# Supplementary material
Source: PubMed Central journal article supplement (PMC4385805)
Supplement: EC.00273-14_zek999094414so1.pdf [file EC.00273-14_zek999094414so1.pdf]

## DNA Oligonucleotides

| Name                    | Direction | R.E.  | Sequence                                        |
|-------------------------|-----------|-------|-------------------------------------------------|
| <i>PUF4</i> KO 5' end   | Forward   | SacI  | 5' TAATAAGAGCTCCTAAGAGTTCCACTATGCCGGG 3'        |
| <i>PUF4</i> KO 5' end   | Reverse   | SacII | 5' TAATAACCGCGGGGGTCAGAGAGGGATTGCG 3'           |
| <i>NAT</i>              | Forward   | XbaI  | 5' TAATAATCTAGAGCTGCGAGGATGTGAGCTGG 3'          |
| <i>NAT</i>              | Reverse   | XbaI  | 5' TAATAATCTAGAAAGCTTATAGAAGAGATGTAGAAACTAGC 3' |
| <i>PUF4</i> KO 3' end   | Forward   | BamHI | 5' TAATAAGGATCCCTGAAGAGCGGATAAAGTCC 3'          |
| <i>PUF4</i> KO 3' end   | Reverse   | XhoI  | 5' TAATAACTCGAGAACAACGGGGTTCCCTTCC 3'           |
| <i>PUF4</i> complement  | Forward   | NotI  | 5' TAATAAGCGGCCCGCCTAAGAGTTCCACTATGCCGGG 3'     |
| <i>PUF4</i> complement  | Reverse   | Sall  | 5' GGGAAAACGTCTCGACTACCC 3'                     |
| <i>NEO</i>              | Forward   | Sall  | 5' TAATAAGTCGACCAGGATTTCGAGTGGCATGG 3'          |
| <i>NEO</i>              | Reverse   | KpnI  | 5' TAATAAGGTACCGACTTGGCCCAAGCTTGG 3'            |
| 5' UTR <i>PUF4</i> RACE | Reverse   |       | 5' CCCATAGAGAATCCGCCACCAACCTTT 3'               |
| 3' UTR <i>PUF4</i> RACE | Forward   |       | 5' AACGCCAGTCTCCCCCTTCTGCTGCTGT 3'              |
| Pumilio domain          | Forward   |       | 5' TAATAACATATGCCTGGCGGATCCATGGG 3'             |
| Pumilio domain          | Reverse   |       | 5' TAATAACATATGTTAGGACGCATCTTCGCGGGCAAGC 3'     |
| <i>HXL1</i> splicing    | Forward   |       | 5' CGTAACTCCACTGTGTCC 3'                        |
| <i>HXL1</i> splicing    | Reverse   |       | 5' CACTCCATTCTTTCTGC 3'                         |
| <i>KAR2</i> probe       | Forward   |       | 5' GCATACCCTTCAAGAATCACACG 3'                   |
| <i>KAR2</i> probe       | Reverse   |       | 5' GCTCGTCGTGGCTGAAAGG 3'                       |
| <i>HXL1</i> probe       | Forward   |       | 5' ACAACAACGTACAGATCAGCGG 3'                    |
| <i>HXL1</i> probe       | Reverse   |       | 5' TCTTTCCTATCCTCACCACCC 3'                     |

## RNA Oligonucleotides

| Name                       | Sequence                                      |
|----------------------------|-----------------------------------------------|
| 5' UTR <i>HXL1</i>         | TYE 705-CUCUUGU <b>UGUAACAGU</b> AGUACCCG     |
| UL 5' UTR <i>HXL1</i>      | CUCUUGU <b>UGUAACAGU</b> AGUACCCG             |
| UL Mut. 5' UTR <i>HXL1</i> | CUCUUGUACAAACAGUAGUACCCG                      |
| 3' UTR <i>HXL1</i>         | TYE 705-GAACGAAGC <b>UGUACCGAU</b> AGUGUGUUUC |
| UL 3' UTR <i>HXL1</i>      | GAACGAAGC <b>UGUACCGAU</b> AGUGUGUUUC         |
| UL Mut. 3' UTR <i>HXL1</i> | GAACGAAGCACAAACCGAUAGUGUGUUUC                 |
| 3' UTR <i>ALG7</i>         | TYE705- GCAUAUA <b>UGUAUUAGUA</b> UUUGUGU     |
| UL 3' UTR <i>ALG7</i>      | GCAUAUA <b>UGUAUUAGUA</b> UUUGUGU             |
| UL Mut. 3' UTR <i>ALG7</i> | GCAUAUAACAUAUAUCAUUUUUGUGU                    |

R.E.- Restriction Enzyme

UL- Unlabeled

Mut.- Mutated PUF element

PUF consensus element in bold
